# Supplementary material
Source: Springer Nature journal article supplement (https://www.springermedizin.de/resource/supplementary/12881_2013_1159_MOESM4_ESM.pdf/9452104)

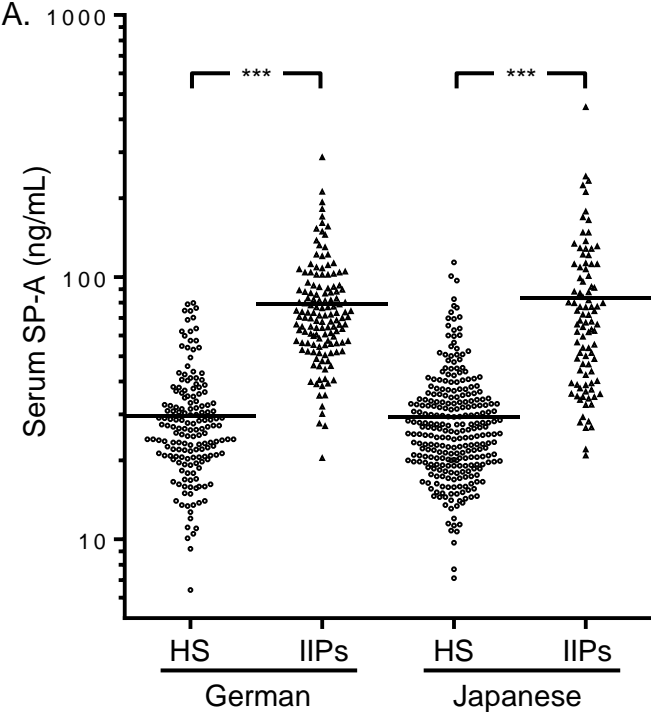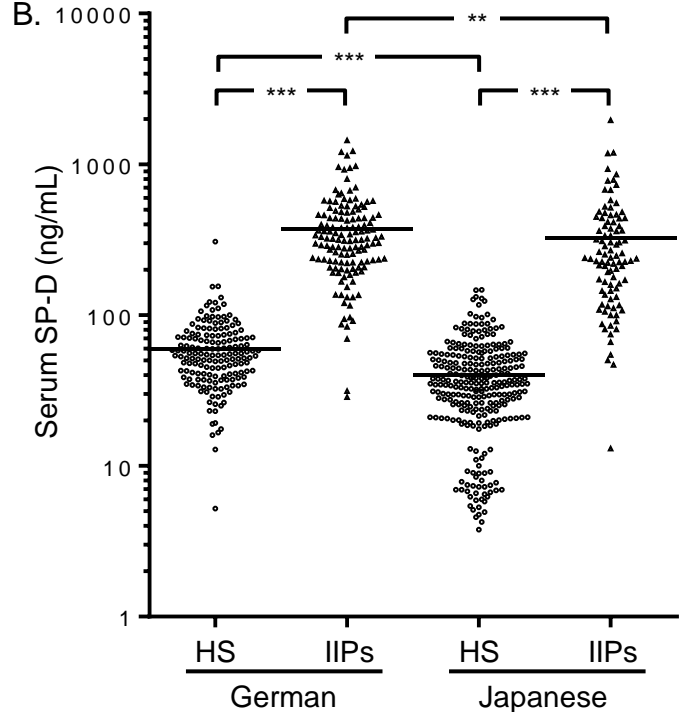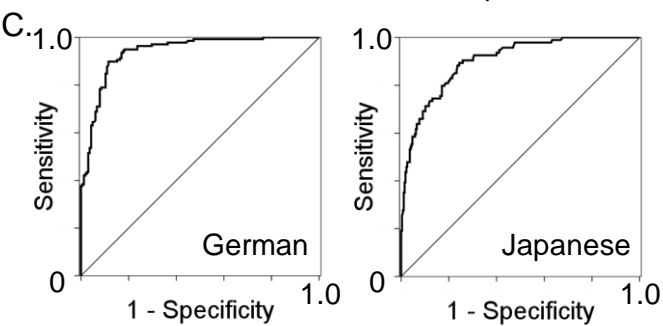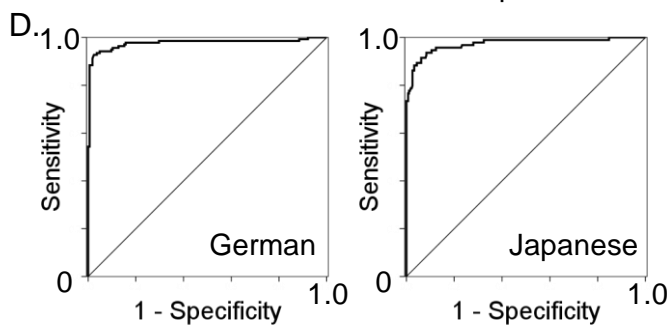

Supplement: MOESM4 [file 9452104]
